# Supplementary material for: Bio-catalytic synthesis of unnatural nucleosides possessing a large functional group such as a fluorescent molecule by purine nucleoside phosphorylase
Source: Royal Society of Chemistry journal article supplement (doi:10.1039/c9cy01063g), 2019-01-01

Electronic Supplementary Information (ESI)

**Biocatalytic synthesis of unnatural nucleosides possessing a large functional group such as a fluorescent molecule, coumarin by purine nucleoside phosphorylase**

Akihiko Hatano,\* Hiroyuki Wakana, Nanae Terado, Aoi Kojima, Chisato Nishioka, Yu Iizuka, Takuya Imaizumi and Sanae Uehara

Department of Chemistry, Shibaura Institute of Technology, 307 Fukasaku, Minuma-ku, Saitama, 337-8570, Japan.

E-mail: a-hatano@sic.shibaura-it.ac.jp

- S1** Effect of enzyme on the production of 2'-deoxynebularine from deoxyribose-1 $\alpha$ -phosphate and purine.
- S2** PNP-catalysed base-exchange reaction between thymidine and purine or uracil modified with a halogen atom at the 5 position.
- S3** Effect of a two-enzyme system, TP and PNP, on the base-exchange reaction of pyrimidine nucleoside with various purines.
- S4** Effect of TP, PNP, and TP+PNP on the base-exchange conversion of thymidine to a modified purine nucleoside.
- S5** Effect of addition of DMSO and hydrophobicity of alkyl amino purine as substrate for base-exchange reaction using PNP or PyNP.
- S6** Effect of organic solvent and enzyme on synthesis of dRC4U.
- S7** Effect of chain length of the alkyl linker between coumarin and the 5 position of uracil on the production of an unnatural nucleoside.

**S1** Effect of enzyme on the production of 2'-deoxynebularine from deoxyribose-1 $\alpha$ -phosphate and purine. Reaction conditions: 5.2 mM of deoxyribose-1-phosphate and 5.0 mM of purine in 1.0 mM phosphate buffer (pH 6.8) at 40 °C. The reaction were carried out under the condition of 5 units/mL of PNP or TP. Product formation was monitored by UV absorption at 254 nm using HPLC (Jasco) with a C18 column (Osaka soda Inc., Capcell pak C18 UG-120,  $\phi$  4.6–250mm, 2–5 % MeCN in 10 mM phosphate buffer, pH 6.8).

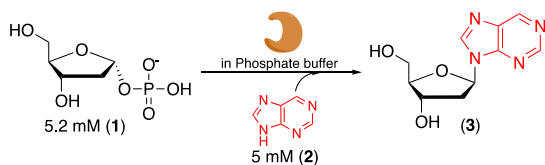

(a) Reaction scheme

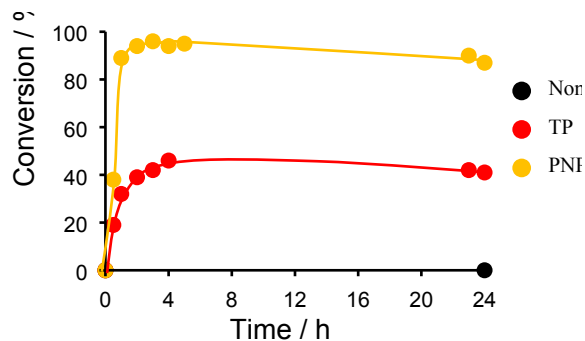

(b) The curves of conversion of 2'-deoxynebularine for time by PNP or TP.

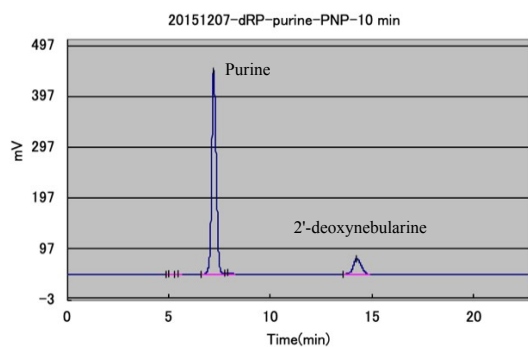

| No. | Rt    | ピーク名 | 面積        | 面積(%)   | 高さ     | 定量結果 |
|-----|-------|------|-----------|---------|--------|------|
| 1   | 5.01  |      | 11828.2   | 0.1679  | 1089   | ---- |
| 2   | 5.47  |      | 9278      | 0.1317  | 959    | ---- |
| 3   | 7.21  |      | 6129750.2 | 87.0113 | 399635 | ---- |
| 4   | 7.92  |      | 51509.4   | 0.7312  | 3009   | ---- |
| 5   | 14.24 |      | 842411.4  | 11.958  | 30541  | ---- |
|     |       |      | 7044777.2 | 100     | 435233 |      |

(c) HPLC chart of using PNP (10 min).

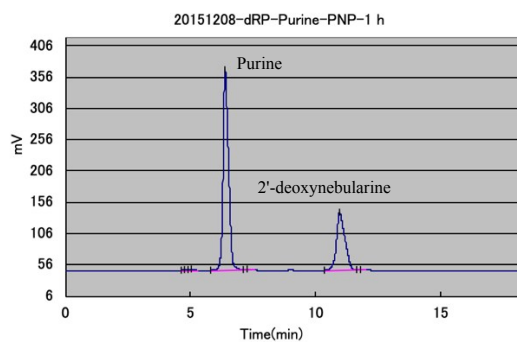

| No. | Rt    | ピーク名 | 面積        | 面積(%)   | 高さ     | 定量結果 |
|-----|-------|------|-----------|---------|--------|------|
| 1   | 4.73  |      | 16316.8   | 0.2312  | 1491   | ---- |
| 2   | 5.04  |      | 24349.4   | 0.345   | 1826   | ---- |
| 3   | 6.38  |      | 4817804.6 | 68.2534 | 321271 | ---- |
| 4   | 7.27  |      | 26084.6   | 0.3695  | 1684   | ---- |
| 5   | 10.96 |      | 2163569.2 | 30.6511 | 92519  | ---- |
| 6   | 11.81 |      | 10577.4   | 0.1498  | 732    | ---- |
|     |       |      | 7058702   | 100     | 419523 |      |

(d) HPLC chart of using PNP (1h).

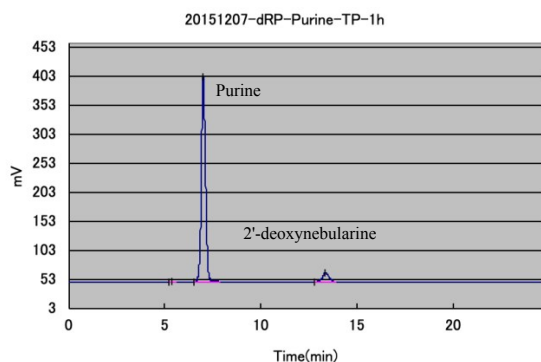

| No. | Rt    | ピーク名 | 面積        | 面積(%)   | 高さ     | 定量結果 |
|-----|-------|------|-----------|---------|--------|------|
| 1   | 5.38  |      | 13111.8   | 0.2291  | 1346   | ---- |
| 2   | 7     |      | 5316553.2 | 92.8995 | 353280 | ---- |
| 3   | 13.35 |      | 393243.2  | 6.8714  | 15413  | ---- |
|     |       |      | 5722908.2 | 100     | 370039 |      |

(e) HPLC chart of using TP (1 h).

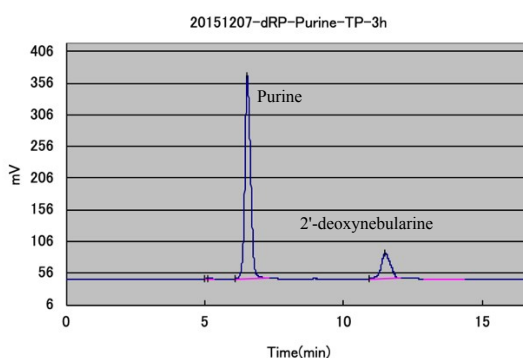

| No. | Rt    | ピーク名 | 面積        | 面積(%)   | 高さ     | 定量結果 |
|-----|-------|------|-----------|---------|--------|------|
| 1   | 5.08  |      | 7247.2    | 0.1313  | 680    | ---- |
| 2   | 6.53  |      | 4587039.4 | 83.0781 | 320393 | ---- |
| 3   | 11.49 |      | 927070    | 16.7906 | 40350  | ---- |
|     |       |      | 5521356.6 | 100     | 361423 |      |

(f) HPLC chart of using TP (3 h).

**S2-1** PNP-catalysed base-exchange reaction between thymidine and purine or uracil modified with a halogen atom at the 5 position.

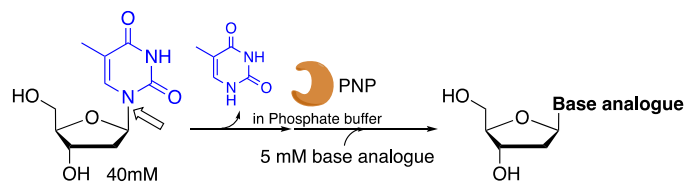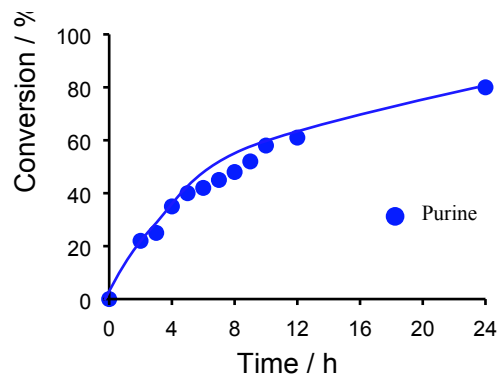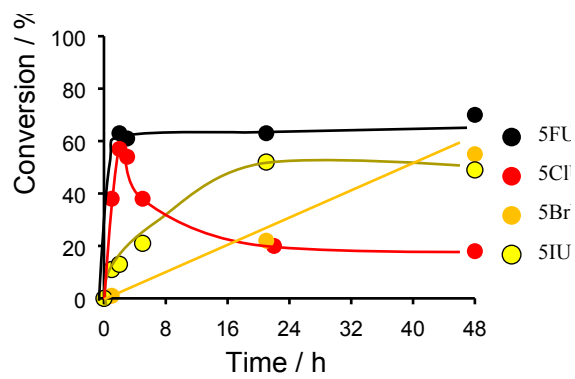

**S2-2** HPLC charts of enzymatic reaction between purine and pyrimidine analogue and thymidine using PNP. (a): the base analogue was purine, (b): 5-fluorouracil, (c): 5-iodouracil, (d): 5-bromouracil. Reaction conditions: 40 mM of thymidine and 5.0 mM of base analogue in 1.0 mM phosphate buffer (pH 6.8) at 40 °C. The reaction volume was 1.0 mL. The reaction was carried out under the condition of 5 units/mL of PNP. Product formation was monitored by UV absorption at 254 nm using HPLC (Jasco) with a C18 column (Osaka soda Inc., Capcell pak C18 UG-120, φ 4.6–250mm, 2–5 % MeCN in 10 mM phosphate buffer, pH 6.8).

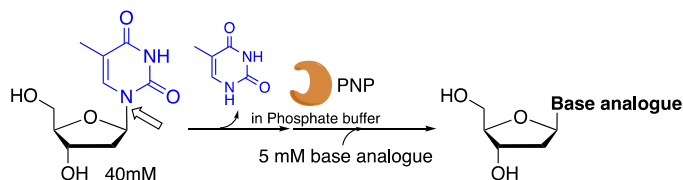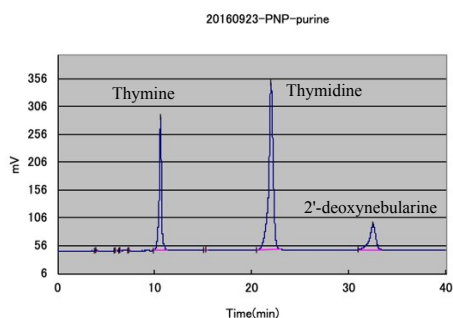

| No. | Rt    | ピーク名               | 面積         | 面積(%)   | 高さ     | 定量結果 |
|-----|-------|--------------------|------------|---------|--------|------|
| 1   | 3.95  |                    | 5432.6     | 0.0351  | 755    | ---- |
| 2   | 5.96  |                    | 8970       | 0.045   | 1002   | ---- |
| 3   | 6.44  |                    | 5970.8     | 0.0385  | 790    | ---- |
| 4   | 7.35  |                    | 6060.4     | 0.0391  | 763    | ---- |
| 5   | 10.6  | Thymine            | 3977306    | 25.6676 | 240023 | ---- |
| 6   | 15.26 |                    | 14740.2    | 0.0951  | 1058   | ---- |
| 7   | 21.97 | Thymidine          | 9455951    | 61.0242 | 299802 | ---- |
| 8   | 32.48 | 2'-deoxynebularine | 2022990.8  | 13.0554 | 45724  | ---- |
|     |       |                    | 15495421.8 | 100     | 589917 |      |

(a)

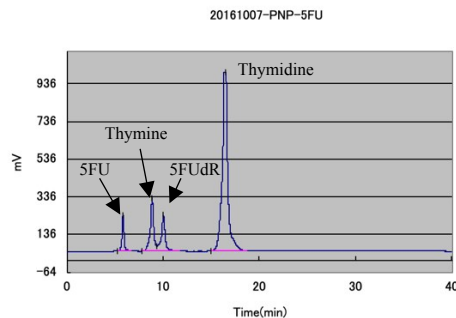

| No. | Rt    | ピーク名      | 面積         | 面積(%)   | 高さ      | 定量結果 |
|-----|-------|-----------|------------|---------|---------|------|
| 1   | 5.85  | 5FU       | 2816623.4  | 5.2518  | 190504  | ---- |
| 2   | 8.86  | Thymine   | 6904581.8  | 12.8741 | 281196  | ---- |
| 3   | 10.03 | 5FUdR     | 5377429.6  | 10.0266 | 191220  | ---- |
| 4   | 16.52 | Thymidine | 38533024   | 71.8475 | 948684  | ---- |
|     |       |           | 53631658.8 | 100     | 1611604 |      |

(b)

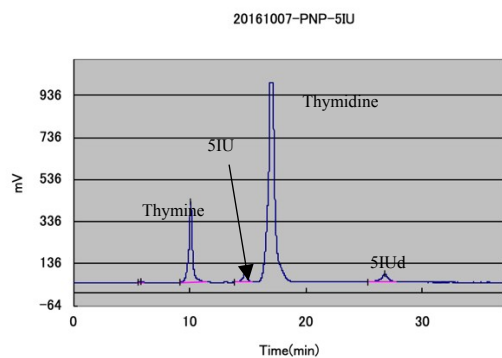

| No. | Rt    | ピーク名    | 面積         | 面積(%)   | 高さ     | 定量結果 |
|-----|-------|---------|------------|---------|--------|------|
| 1   | 5.83  |         | 31897.2    | 0.2885  | 2732   | ---- |
| 2   | 10.1  | Thymine | 8227047.2  | 74.4225 | 381570 | ---- |
| 3   | 14.79 | 5IU     | 1226600    | 11.0959 | 49617  | ---- |
| 4   | 26.78 | 5IUd    | 1568972.4  | 14.193  | 38021  | ---- |
|     |       |         | 11054516.8 | 100     | 471940 |      |

(c)

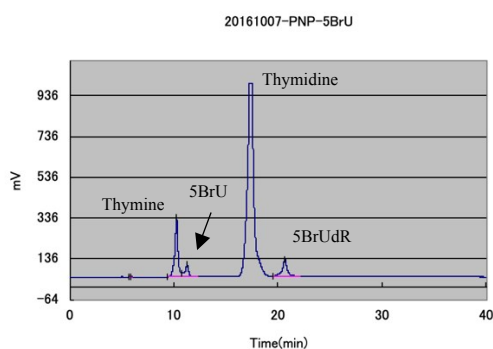

| No. | Rt    | ピーク名    | 面積         | 面積(%)   | 高さ     | 定量結果 |
|-----|-------|---------|------------|---------|--------|------|
| 1   | 5.87  |         | 11460.4    | 0.1105  | 1188   | ---- |
| 2   | 10.25 | Thymine | 6155048.6  | 59.3625 | 293347 | ---- |
| 3   | 11.28 | 5BrU    | 1529160    | 14.748  | 59660  | ---- |
| 4   | 20.65 | 5BrUdR  | 2672912.6  | 25.779  | 82938  | ---- |
|     |       |         | 10368581.6 | 100     | 437133 |      |

(d)

**S3** Effect of a two-enzyme system, TP and PNP, on the base-exchange reaction of pyrimidine nucleoside with various purines. Left: 5 mM of thymidine and 40 mM of purine modified at 6 position. Right: 10 mM of 6-chloropurine and 5 mM of four kinds of ribosyl donor.

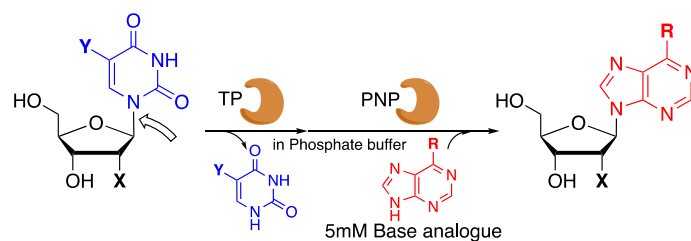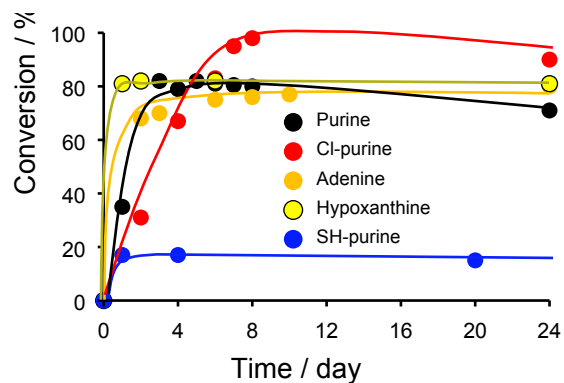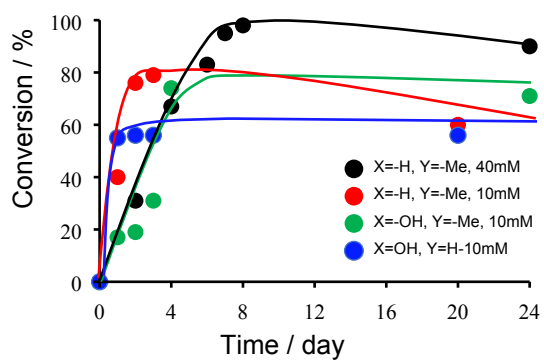

**S4** Effect of TP, PNP, and TP+PNP on the base-exchange conversion of thymidine to a modified purine nucleoside.

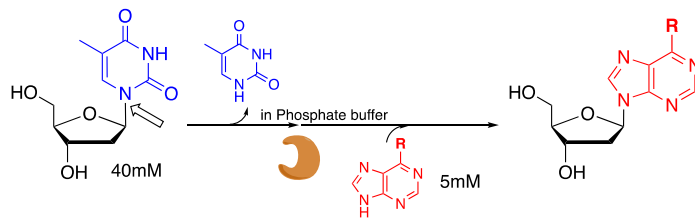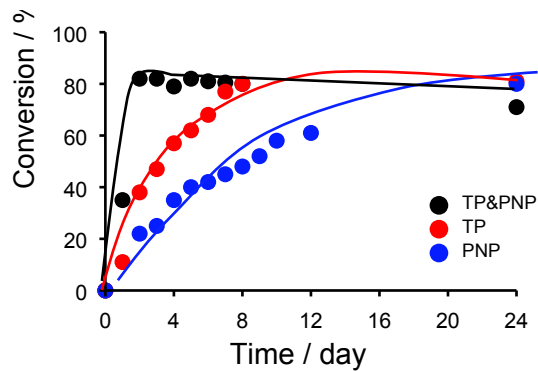

**Purine**

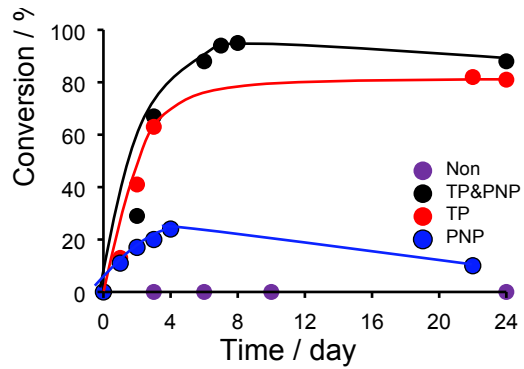

**Chloropurine**

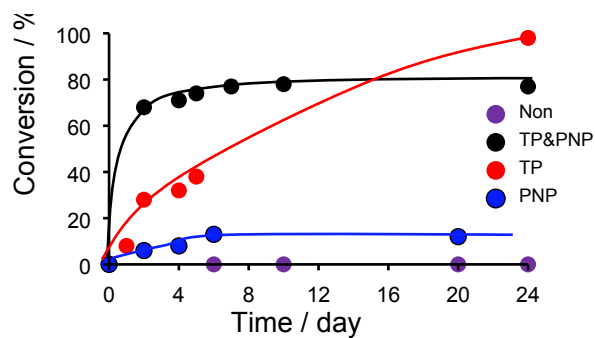

**Adenine**

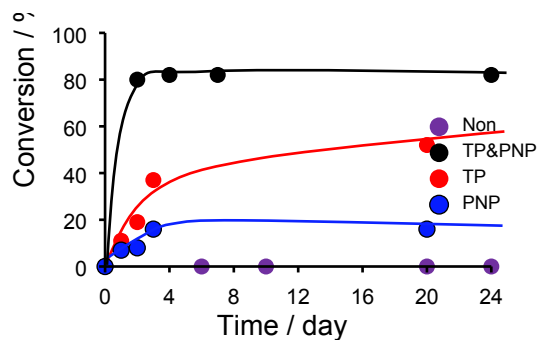

**Hypoxanthine**

**S5-1** Effect of addition of DMSO and hydrophobicity of alkyl amino purine as substrate for base-exchange reaction using PyNP.

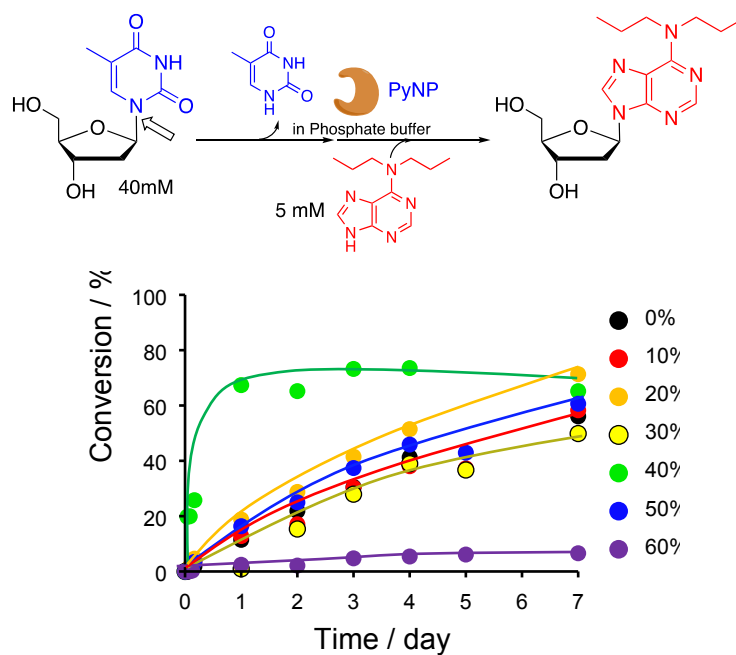

**S5-2** Effect of addition of DMSO and hydrophobicity of alkyl amino purine as substrate for base-exchange reaction using PNP.

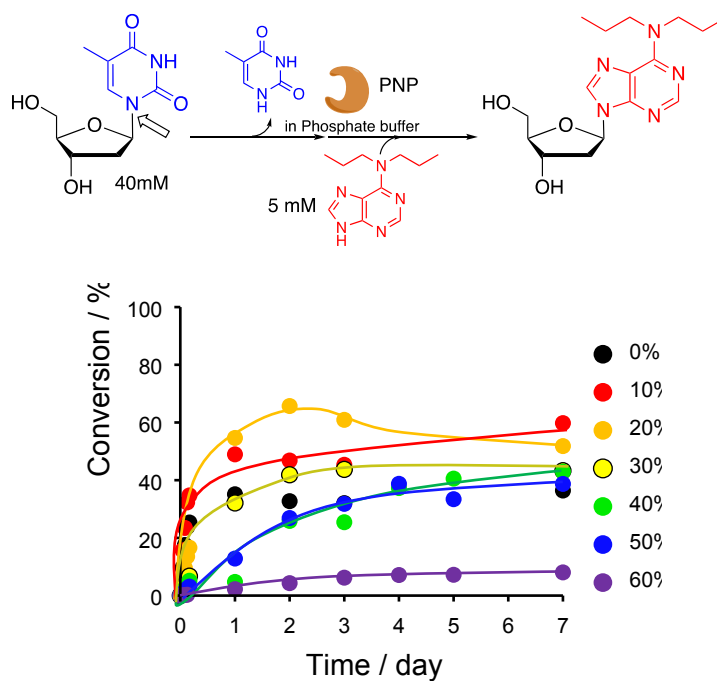

**S5-3** HPLC charts of enzymatic reaction between 6-(*N,N*-di-*n*-propylamino) purine and thymidine in 40 % DMSO/buffer using PNP. Reaction conditions: 40 mM of thymidine and 5.0 mM of 6-propylaminopurine in 1.0 mM phosphate buffer (pH 6.8) and the addition of DMSO (40%, v/v) at 40 °C. The reaction volume was 1.0 mL. The reaction were carried out under the condition of 5 units/mL of PNP. Product formation was monitored by UV absorption at 254 nm using HPLC (Jasco) with a C18 column (Osaka soda Inc., Capcell pak C18 UG-120, φ 4.6–250mm, 10 % MeCN in 10 mM phosphate buffer; pH 6.8).

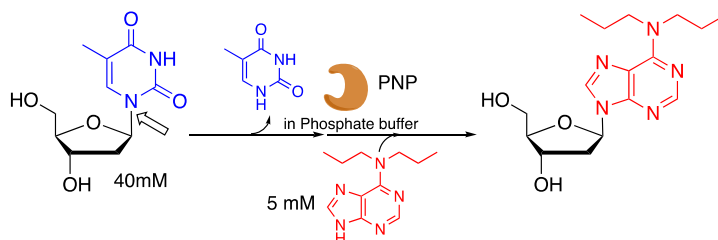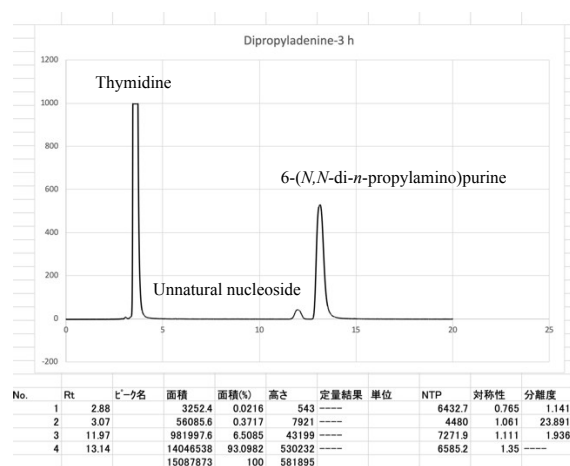

(a) 3h

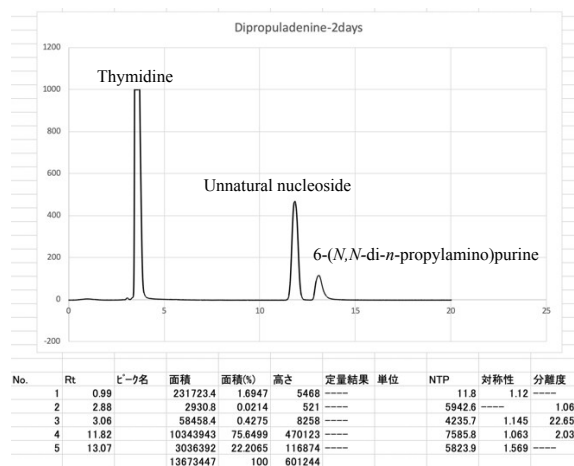

(b) 2days

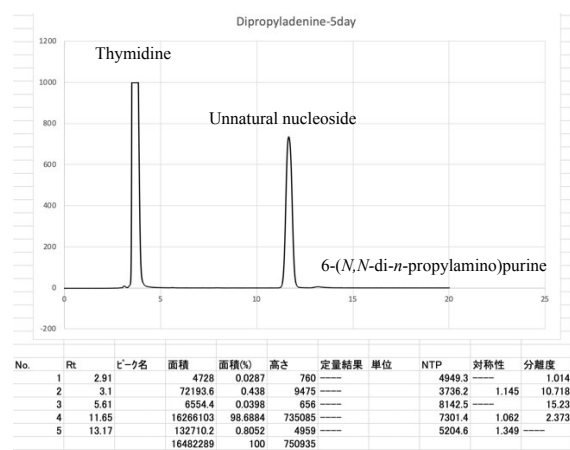

(c) 5days



S6 Effect of organic solvent and enzyme on synthesis of dRC4U.

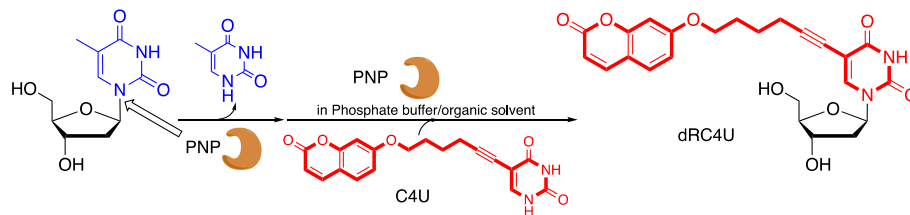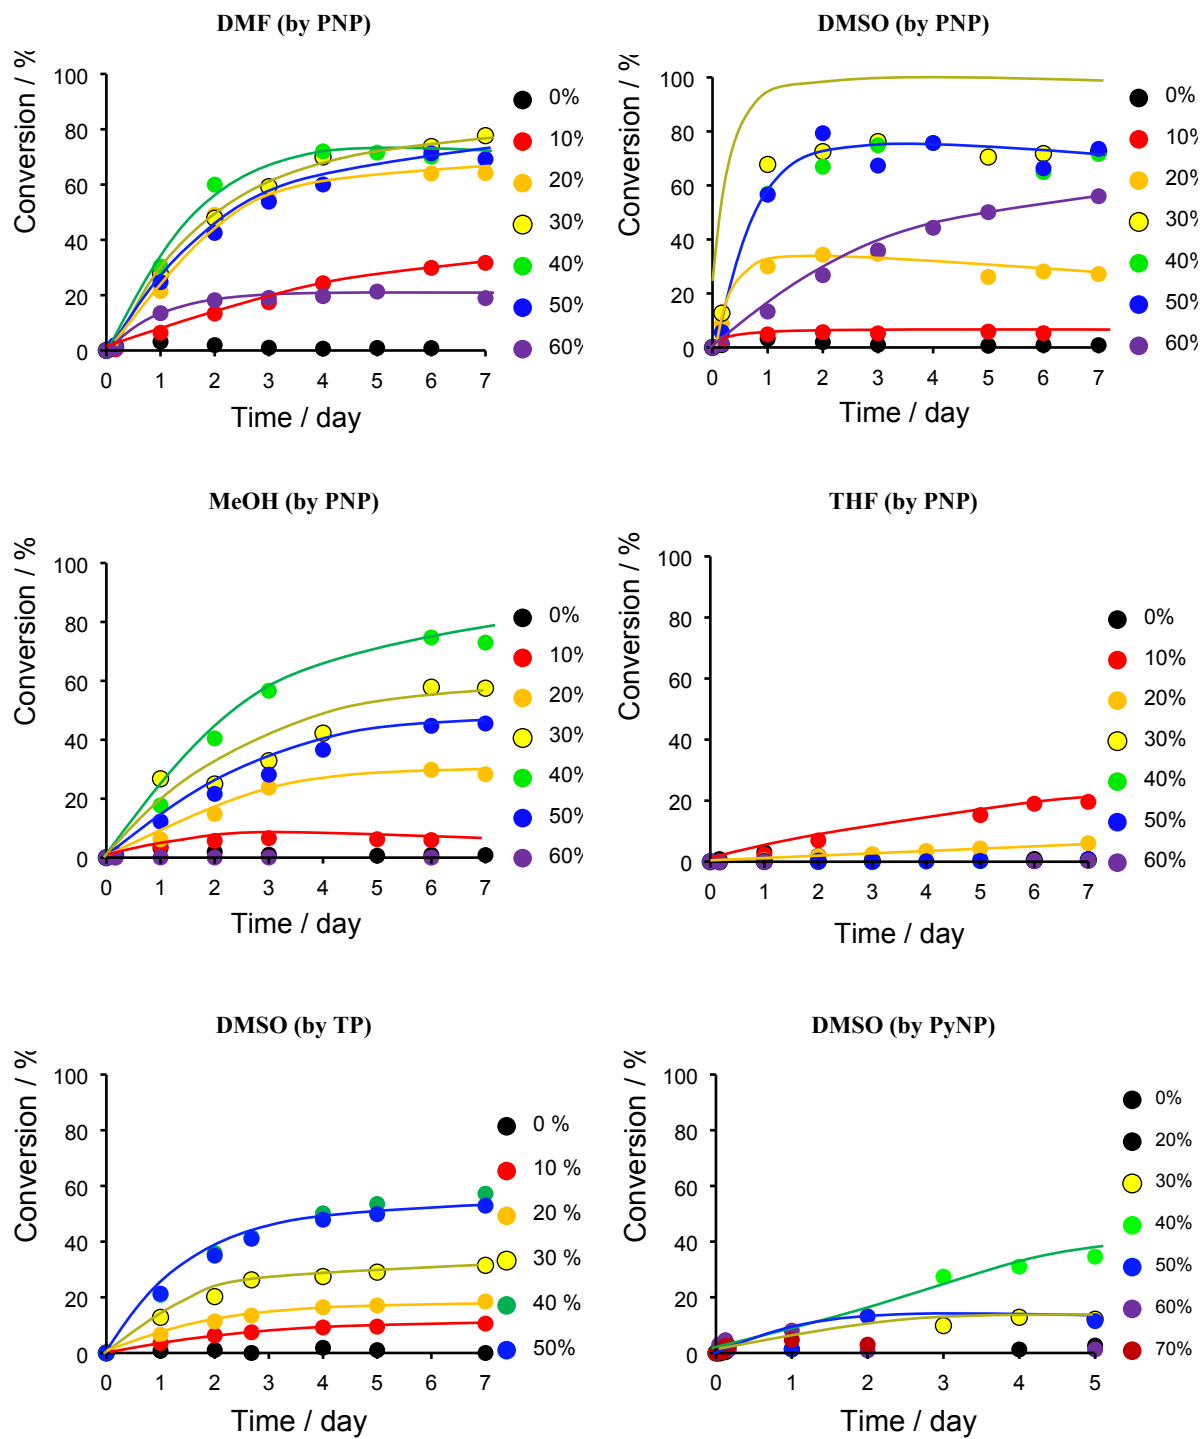

**S7** Effect of chain length of the alkyl linker between coumarin and the 5 position of uracil on the production of an unnatural nucleoside. Time courses of dRC4U **(a)** and dRC6U **(b)** conversion at varying DMSO concentrations.

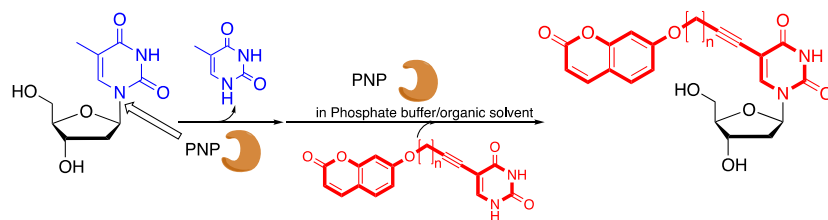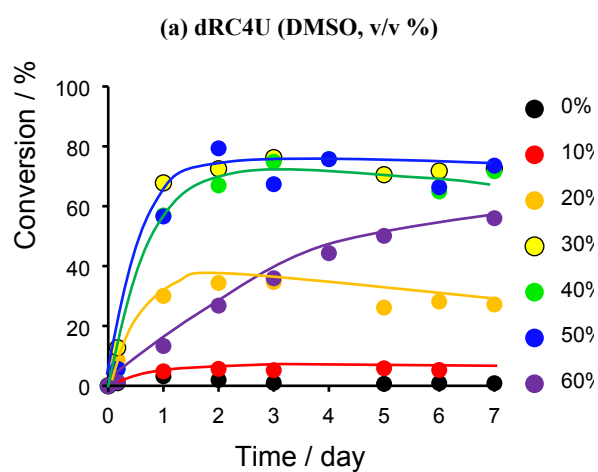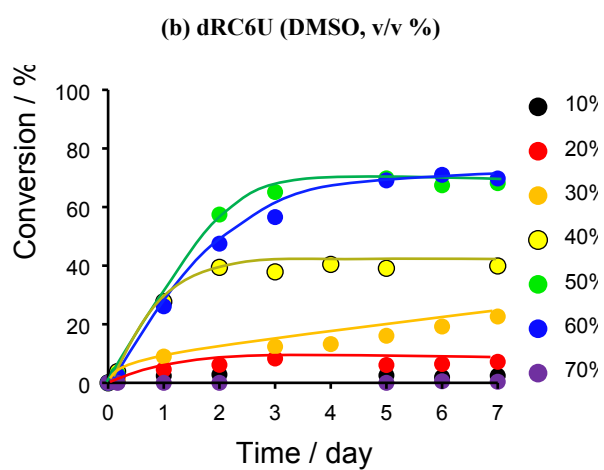

Supplement: c9cy01063g1.pdf [file c9cy01063g1.pdf]
